# Supplementary material
Source: publisher figshare collection journal article supplement (https://karger.figshare.com/ndownloader/files/36448878)
Supplement: Supplementary file 1 [file 36448878]

**SUPPLEMENTARY FIGURE 1**

Thoracic ultrasound and elastonosographic images (posterior scans) of a 71-year old male patient, smoker, with COPD confirmed on spirometric tests.

**SUPPLEMENTARY FIGURE 2**

Thoracic ultrasound and elastonosographic images (posterior scans) of a 73-year old male, smoker, with normal spirometric parameters.

**SUPPLEMENTARY FIGURE 3**

Thoracic ultrasound and elastonosographic images (posterior scans) of a 29-year old male, habitual smoker since the age of 19, with normal spirometry.

**SUPPLEMENTARY FIGURE 4**

Thoracic ultrasound and elastonosographic images (posterior scans) of a 69-year old female, never smoker, with normal respiratory function.
